# Supplementary material
Source: publisher figshare collection journal article supplement (https://diabetesjournals.figshare.com/articles/dataset/_/19122485)
Supplement: Supplementary file 1 [file 1]

## Sheet: UKB-Diabetes
CHROM	POS	ID	REF	ALT	A1	FIRTH?	TEST	OBS_CT	OR	LOG(OR)_SE	Z_STAT	P
CVD
6	160985526	rs118039278	G	A	A	N	ADD	17540	1.35208	0.0517123	5.83319	5.43784e-09
6	160997118	rs74617384	A	T	T	N	ADD	17540	1.34397	0.0514689	5.74386	9.25449e-09
6	161005610	rs55730499	C	T	T	N	ADD	17540	1.34521	0.0514029	5.76908	7.97035e-09
6	161010118	rs10455872	A	G	G	N	ADD	17540	1.34944	0.0514383	5.82618	5.6712e-09
9	22040765	rs1333037	C	T	C	N	ADD	17540	0.846046	0.0304936	-5.48252	4.19303e-08
9	22045317	rs1360589	C	T	C	N	ADD	17540	0.845016	0.030616	-5.50039	3.78957e-08
9	22048414	rs7028268	G	A	A	N	ADD	17540	1.19225	0.0308631	5.69746	1.21605e-08
9	22050613	rs944799	A	G	G	N	ADD	17540	1.18685	0.03021	5.67038	1.42484e-08
9	22051670	rs944801	G	C	G	N	ADD	17540	0.844667	0.0306159	-5.51389	3.50987e-08
9	22052734	rs6475604	T	C	T	N	ADD	17540	0.843213	0.0305985	-5.57334	2.49895e-08
9	22052810	rs10757267	G	C	C	N	ADD	17540	1.18933	0.0301786	5.74544	9.16805e-09
9	22053687	rs10965219	A	G	G	N	ADD	17540	1.1872	0.0301701	5.68764	1.28806e-08
9	22053709	rs7027048	A	G	G	N	ADD	17540	1.18814	0.0301764	5.71279	1.11138e-08
9	22054040	rs7030641	C	T	C	N	ADD	17540	0.843819	0.0305868	-5.55197	2.82465e-08
9	22054690	rs7874604	T	C	C	N	ADD	17540	1.18704	0.0302041	5.6768	1.3724e-08
9	22055048	rs2383204	A	G	G	N	ADD	17540	1.18766	0.0301834	5.6981	1.21147e-08
9	22056295	rs7853090	T	C	T	N	ADD	17540	0.843345	0.0306372	-5.5612	2.67932e-08
9	22056359	rs7866783	A	G	A	N	ADD	17540	0.844099	0.0306428	-5.53101	3.18398e-08
9	22056499	rs10120688	G	A	A	N	ADD	17540	1.18403	0.0301706	5.59905	2.15532e-08
9	22060935	rs2383205	A	G	A	N	ADD	17540	0.831787	0.0310722	-5.92747	3.07637e-09
9	22061562	rs2184061	C	A	C	N	ADD	17540	0.829393	0.0310632	-6.02197	1.72312e-09
9	22061614	rs1537378	A	G	A	N	ADD	17540	0.831297	0.0310723	-5.9464	2.74111e-09
9	22064391	rs8181050	G	A	G	N	ADD	17540	0.83223	0.0310465	-5.9152	3.3147e-09
9	22065002	rs10811647	C	G	G	N	ADD	17540	1.21362	0.0303035	6.38908	1.66886e-10
9	22065657	rs1333039	G	C	G	N	ADD	17540	0.832202	0.0310358	-5.91833	3.25228e-09
9	22066211	9:22066211_ATT_A	ATT	A	ATT	N	ADD	17540	0.83235	0.0314391	-5.83677	5.32217e-09
9	22066363	rs4977755	T	A	T	N	ADD	17540	0.831931	0.0310507	-5.92597	3.10455e-09
9	22067004	rs10965223	G	A	G	N	ADD	17540	0.832815	0.0310191	-5.8978	3.68385e-09
9	22067276	rs10965224	T	A	T	N	ADD	17540	0.832481	0.0310185	-5.91081	3.40419e-09
9	22067542	rs10811648	C	T	C	N	ADD	17540	0.833492	0.0310499	-5.86578	4.47038e-09
9	22067554	rs10811649	C	T	C	N	ADD	17540	0.833612	0.0310449	-5.86206	4.57155e-09
9	22067593	rs10811650	A	G	G	N	ADD	17540	1.21136	0.0302838	6.3315	2.42794e-10
9	22067830	rs10811651	G	A	G	N	ADD	17540	0.832641	0.0310203	-5.9043	3.54147e-09
9	22068652	rs4977756	G	A	G	N	ADD	17540	0.832444	0.0310112	-5.91365	3.3461e-09
9	22069354	rs35572758	A	AT	A	N	ADD	17540	0.832235	0.0310826	-5.90817	3.45938e-09
9	22071750	rs4451405	C	T	C	N	ADD	17540	0.829826	0.0310731	-6.00323	1.93425e-09
9	22071751	rs4645630	G	A	G	N	ADD	17540	0.832239	0.031141	-5.89691	3.70371e-09
9	22072264	rs10757269	A	G	A	N	ADD	17540	0.812595	0.0301887	-6.87418	6.23459e-12
9	22072301	rs9632884	G	C	G	N	ADD	17540	0.811984	0.0301901	-6.89877	5.24565e-12
9	22072638	rs9632885	G	A	A	N	ADD	17540	1.23431	0.030171	6.97727	3.00966e-12
9	22072719	rs10757270	A	G	G	N	ADD	17540	1.22477	0.0303491	6.68076	2.37714e-11
9	22076071	rs1831733	T	C	C	N	ADD	17540	1.23163	0.0302029	6.8981	5.27035e-12
9	22076795	rs10757271	A	G	A	N	ADD	17540	0.811718	0.0301581	-6.91695	4.61473e-12
9	22077085	rs10811652	A	C	A	N	ADD	17540	0.811175	0.0301584	-6.9391	3.94619e-12
9	22081397	rs10116277	G	T	T	N	ADD	17540	1.19766	0.0300543	6.00158	1.95406e-09
9	22081850	rs6475606	C	T	T	N	ADD	17540	1.19687	0.0300493	5.9806	2.22316e-09
9	22084310	rs1537370	C	T	T	N	ADD	17540	1.20215	0.0300996	6.11669	9.55397e-10
9	22085598	rs1970112	T	C	C	N	ADD	17540	1.20459	0.0301227	6.17938	6.4352e-10
9	22088090	rs10738606	A	T	T	N	ADD	17540	1.20075	0.030007	6.09688	1.08158e-09
9	22088094	rs10738607	A	G	G	N	ADD	17540	1.20101	0.0300077	6.10374	1.03613e-09
9	22088260	rs10757272	C	T	T	N	ADD	17540	1.20254	0.0299826	6.15145	7.67792e-10
9	22090521	rs9644859	G	A	G	N	ADD	17540	0.831874	0.030045	-6.12663	8.9758e-10
9	22090603	rs9644860	C	T	C	N	ADD	17540	0.831855	0.0300449	-6.12738	8.93371e-10
9	22090935	rs9644861	C	T	C	N	ADD	17540	0.827903	0.030072	-6.28025	3.38034e-10
9	22090936	rs9644862	T	G	T	N	ADD	17540	0.827904	0.0300721	-6.28017	3.38198e-10
9	22091069	rs10811653	C	T	C	N	ADD	17540	0.83188	0.0300463	-6.12613	9.00422e-10
9	22091924	rs7866503	G	T	G	N	ADD	17540	0.831856	0.0300492	-6.12648	8.98449e-10
9	22092257	rs2210538	G	A	G	N	ADD	17540	0.832586	0.0300615	-6.09479	1.09582e-09
9	22092924	rs10811654	A	G	G	N	ADD	17540	1.20595	0.0300969	6.22213	4.90449e-10
9	22093299	rs4007642	A	T	T	N	ADD	17540	1.1944	0.030152	5.89163	3.82401e-09
9	22094330	rs4977757	A	G	A	N	ADD	17540	0.830926	0.0300997	-6.15337	7.58515e-10
9	22094796	rs10738608	A	C	A	N	ADD	17540	0.830937	0.0300987	-6.15312	7.59731e-10
9	22096055	rs10757274	A	G	G	N	ADD	17540	1.20757	0.0300493	6.27674	3.45745e-10
9	22098574	rs4977574	A	G	G	N	ADD	17540	1.20601	0.030046	6.23436	4.53624e-10
9	22098619	rs2891168	A	G	G	N	ADD	17540	1.20621	0.0300525	6.23853	4.41697e-10
9	22099568	rs1537371	C	A	C	N	ADD	17540	0.828633	0.0300862	-6.248	4.15732e-10
9	22099746	rs5896965	T	TA	TA	N	ADD	17540	1.2066	0.0300726	6.24516	4.23359e-10
9	22100176	rs1556516	G	C	G	N	ADD	17540	0.828669	0.0300847	-6.24687	4.18762e-10
9	22102165	rs7859727	C	T	T	N	ADD	17540	1.20929	0.0300794	6.31784	2.65253e-10
9	22103183	rs1537372	G	T	T	N	ADD	17540	1.18681	0.0302877	5.6547	1.56114e-08
9	22103341	rs1537373	T	G	T	N	ADD	17540	0.827278	0.0300822	-6.30321	2.91539e-10
9	22103813	rs1333042	A	G	A	N	ADD	17540	0.827252	0.0300934	-6.30189	2.9404e-10
9	22105927	rs7859362	T	C	T	N	ADD	17540	0.836478	0.0300779	-5.93642	2.91309e-09
9	22106225	rs10757275	G	A	A	N	ADD	17540	1.19481	0.0300558	5.92188	3.18273e-09
9	22106271	rs6475609	A	G	A	N	ADD	17540	0.836443	0.0300787	-5.93765	2.89134e-09
9	22106731	rs1333043	T	A	T	N	ADD	17540	0.836635	0.0300804	-5.92969	3.035e-09
9	22110131	rs1412834	T	C	T	N	ADD	17540	0.836567	0.0300806	-5.93236	2.98616e-09
9	22111584	rs112917455	T	TATTTG	T	N	ADD	17540	0.8347	0.0301274	-5.9973	2.00624e-09
9	22112241	rs7341786	A	C	A	N	ADD	17540	0.835516	0.0301021	-5.9699	2.37406e-09
9	22112427	rs7341791	A	G	A	N	ADD	17540	0.835485	0.0301042	-5.97068	2.36264e-09
9	22112599	rs10511701	T	C	T	N	ADD	17540	0.835398	0.0300822	-5.97853	2.25156e-09
9	22114469	rs10733376	G	C	G	N	ADD	17540	0.836615	0.0300772	-5.93111	3.00895e-09
9	22115026	rs2383206	A	G	A	N	ADD	17540	0.836707	0.0300578	-5.93129	3.00555e-09
9	22115286	rs944797	T	C	T	N	ADD	17540	0.836747	0.0300579	-5.92966	3.03566e-09
9	22115589	rs1004638	A	T	A	N	ADD	17540	0.836107	0.030073	-5.95214	2.64664e-09
9	22115959	rs2383207	A	G	A	N	ADD	17540	0.835248	0.0300643	-5.98805	2.1237e-09
9	22116046	rs1537374	A	G	A	N	ADD	17540	0.835882	0.0300768	-5.96033	2.51728e-09
9	22116071	rs1537375	T	C	T	N	ADD	17540	0.835695	0.0300678	-5.96957	2.37878e-09
9	22116220	rs1537376	T	C	T	N	ADD	17540	0.836646	0.0300578	-5.93371	2.96156e-09
9	22119195	rs1333045	T	C	T	N	ADD	17540	0.834783	0.0298794	-6.04375	1.50572e-09
9	22120482	rs67452501	C	CT	C	N	ADD	17540	0.836122	0.0301521	-5.93592	2.922e-09
9	22121349	rs10217586	A	T	A	N	ADD	17540	0.837522	0.0300433	-5.90175	3.5967e-09
9	22121369	rs66653240	T	TA	T	N	ADD	17540	0.835626	0.0302013	-5.94592	2.74917e-09
9	22123766	rs10738610	A	C	C	N	ADD	17540	1.2134	0.0300144	6.4445	1.15985e-10
9	22124123	rs1333046	T	A	A	N	ADD	17540	1.20974	0.0300165	6.34326	2.24949e-10
9	22124140	rs7857118	A	T	A	N	ADD	17540	0.825703	0.0300585	-6.37157	1.87101e-10
9	22124450	rs10757277	A	G	G	N	ADD	17540	1.21324	0.0299149	6.46139	1.03743e-10
9	22124472	rs10811656	C	T	T	N	ADD	17540	1.20328	0.0299029	6.18829	6.08185e-10
9	22124477	rs10757278	A	G	G	N	ADD	17540	1.21316	0.0299133	6.45955	1.05012e-10
9	22124504	rs1333047	A	T	A	N	ADD	17540	0.822283	0.0299388	-6.53571	6.33105e-11
9	22124630	rs10757279	A	G	G	N	ADD	17540	1.21318	0.0299057	6.46192	1.0338e-10
9	22124744	rs4977575	C	G	C	N	ADD	17540	0.823628	0.02994	-6.48086	9.12008e-11
9	22125347	rs1333048	A	C	C	N	ADD	17540	1.20034	0.0299877	6.0893	1.13404e-09
9	22125503	rs1333049	G	C	C	N	ADD	17540	1.20253	0.0299265	6.16256	7.15797e-10
MI
9	22072264	rs10757269	A	G	A	N	ADD	16310	0.807985	0.0387219	-5.50625	3.66567e-08
9	22072301	rs9632884	G	C	G	N	ADD	16310	0.807297	0.0387257	-5.52769	3.24475e-08
9	22076071	rs1831733	T	C	C	N	ADD	16310	1.23955	0.0387562	5.54109	3.00587e-08
9	22076795	rs10757271	A	G	A	N	ADD	16310	0.803148	0.0386872	-5.66639	1.45834e-08
9	22077085	rs10811652	A	C	A	N	ADD	16310	0.802634	0.0386867	-5.68299	1.32356e-08
9	22124450	rs10757277	A	G	G	N	ADD	16310	1.23387	0.0383856	5.47478	4.38045e-08
9	22124477	rs10757278	A	G	G	N	ADD	16310	1.2329	0.0383866	5.45426	4.91767e-08
9	22124504	rs1333047	A	T	A	N	ADD	16310	0.803025	0.0384239	-5.7092	1.13506e-08
9	22124630	rs10757279	A	G	G	N	ADD	16310	1.23274	0.0383755	5.45247	4.96762e-08
9	22124744	rs4977575	C	G	C	N	ADD	16310	0.804609	0.0384218	-5.65821	1.52956e-08
PCI
6	160985526	rs118039278	G	A	A	N	ADD	16252	1.49386	0.0658924	6.09119	1.12075e-09
6	160997118	rs74617384	A	T	T	N	ADD	16252	1.48404	0.065568	6.02078	1.73575e-09
6	161005610	rs55730499	C	T	T	N	ADD	16252	1.48634	0.0654855	6.05194	1.43113e-09
6	161010118	rs10455872	A	G	G	N	ADD	16252	1.49419	0.0654635	6.1345	8.54286e-10
6	161013013	rs140570886	T	C	C	N	ADD	16252	2.07877	0.13149	5.56528	2.61739e-08
9	22031005	rs7865618	G	A	G	N	ADD	16252	0.798021	0.0407025	-5.54316	2.97062e-08
9	22033366	rs2157719	C	T	C	N	ADD	16252	0.795498	0.0406714	-5.62524	1.85249e-08
9	22036112	rs1008878	G	T	G	N	ADD	16252	0.798378	0.0407062	-5.53168	3.17181e-08
9	22036367	rs1556515	C	T	C	N	ADD	16252	0.795062	0.0407334	-5.63015	1.80048e-08
9	22040765	rs1333037	C	T	C	N	ADD	16252	0.787617	0.0408053	-5.85079	4.89243e-09
9	22043926	rs1412829	A	G	G	N	ADD	16252	0.799274	0.0410461	-5.45852	4.80107e-08
9	22045317	rs1360589	C	T	C	N	ADD	16252	0.790348	0.0409594	-5.74428	9.23135e-09
9	22048414	rs7028268	G	A	A	N	ADD	16252	1.25174	0.0408058	5.50244	3.7456e-08
9	22049482	rs34713115	C	CTT	C	N	ADD	16252	0.791678	0.0409676	-5.70207	1.18359e-08
9	22051670	rs944801	G	C	G	N	ADD	16252	0.789041	0.0409668	-5.78364	7.30992e-09
9	22052734	rs6475604	T	C	T	N	ADD	16252	0.787409	0.0409438	-5.83745	5.30047e-09
9	22052810	rs10757267	G	C	C	N	ADD	16252	1.25024	0.0401613	5.561	2.6824e-08
9	22053687	rs10965219	A	G	G	N	ADD	16252	1.24561	0.0401441	5.471	4.47493e-08
9	22053709	rs7027048	A	G	G	N	ADD	16252	1.24691	0.0401547	5.49543	3.89764e-08
9	22053956	9:22053956_TA_T	TA	T	TA	N	ADD	16252	0.797801	0.0412508	-5.47615	4.34668e-08
9	22054040	rs7030641	C	T	C	N	ADD	16252	0.787987	0.0409231	-5.82246	5.79869e-09
9	22054690	rs7874604	T	C	C	N	ADD	16252	1.24785	0.0401943	5.50876	3.61371e-08
9	22055048	rs2383204	A	G	G	N	ADD	16252	1.24609	0.0401662	5.47743	4.31542e-08
9	22056295	rs7853090	T	C	T	N	ADD	16252	0.788525	0.040984	-5.79718	6.74388e-09
9	22056359	rs7866783	A	G	A	N	ADD	16252	0.787639	0.041002	-5.82204	5.81331e-09
9	22060935	rs2383205	A	G	A	N	ADD	16252	0.784493	0.0415486	-5.84178	5.16463e-09
9	22061562	rs2184061	C	A	C	N	ADD	16252	0.783978	0.0415231	-5.86117	4.59604e-09
9	22061614	rs1537378	A	G	A	N	ADD	16252	0.783247	0.0415516	-5.8796	4.11267e-09
9	22064391	rs8181050	G	A	G	N	ADD	16252	0.787424	0.0415045	-5.75813	8.50487e-09
9	22065002	rs10811647	C	G	G	N	ADD	16252	1.26827	0.0401609	5.91749	3.26882e-09
9	22065657	rs1333039	G	C	G	N	ADD	16252	0.79023	0.0414686	-5.67734	1.36807e-08
9	22066211	9:22066211_ATT_A	ATT	A	ATT	N	ADD	16252	0.787305	0.0420262	-5.69024	1.26858e-08
9	22066363	rs4977755	T	A	T	N	ADD	16252	0.789187	0.0414915	-5.70603	1.15641e-08
9	22067004	rs10965223	G	A	G	N	ADD	16252	0.792107	0.0414371	-5.62439	1.86159e-08
9	22067276	rs10965224	T	A	T	N	ADD	16252	0.792368	0.0414338	-5.61688	1.94435e-08
9	22067542	rs10811648	C	T	C	N	ADD	16252	0.793083	0.0414776	-5.5892	2.28112e-08
9	22067554	rs10811649	C	T	C	N	ADD	16252	0.793027	0.0414721	-5.59166	2.2491e-08
9	22067593	rs10811650	A	G	G	N	ADD	16252	1.2649	0.0401375	5.85468	4.77927e-09
9	22067830	rs10811651	G	A	G	N	ADD	16252	0.792592	0.0414374	-5.60958	2.02822e-08
9	22068652	rs4977756	G	A	G	N	ADD	16252	0.792525	0.0414231	-5.61357	1.9819e-08
9	22069354	rs35572758	A	AT	A	N	ADD	16252	0.78672	0.0415601	-5.77194	7.83629e-09
9	22071750	rs4451405	C	T	C	N	ADD	16252	0.786921	0.0415294	-5.77008	7.92344e-09
9	22071751	rs4645630	G	A	G	N	ADD	16252	0.79209	0.0415909	-5.60411	2.09323e-08
9	22072264	rs10757269	A	G	A	N	ADD	16252	0.763002	0.0400841	-6.74819	1.49705e-11
9	22072301	rs9632884	G	C	G	N	ADD	16252	0.762227	0.0400878	-6.7729	1.26223e-11
9	22072638	rs9632885	G	A	A	N	ADD	16252	1.31742	0.0400895	6.87659	6.13026e-12
9	22072719	rs10757270	A	G	G	N	ADD	16252	1.28059	0.0402156	6.14988	7.75418e-10
9	22076071	rs1831733	T	C	C	N	ADD	16252	1.30551	0.0401368	6.6422	3.0903e-11
9	22076795	rs10757271	A	G	A	N	ADD	16252	0.763039	0.0400597	-6.75109	1.46743e-11
9	22077085	rs10811652	A	C	A	N	ADD	16252	0.763418	0.0400567	-6.73919	1.59267e-11
9	22081397	rs10116277	G	T	T	N	ADD	16252	1.27525	0.0399271	6.08971	1.13118e-09
9	22081850	rs6475606	C	T	T	N	ADD	16252	1.2741	0.0399205	6.06808	1.29446e-09
9	22084310	rs1537370	C	T	T	N	ADD	16252	1.27431	0.0399749	6.06399	1.32781e-09
9	22085598	rs1970112	T	C	C	N	ADD	16252	1.27536	0.0400155	6.07839	1.21392e-09
9	22088090	rs10738606	A	T	T	N	ADD	16252	1.28842	0.0399257	6.3472	2.1927e-10
9	22088094	rs10738607	A	G	G	N	ADD	16252	1.28885	0.0399273	6.35529	2.08028e-10
9	22088260	rs10757272	C	T	T	N	ADD	16252	1.29238	0.0398902	6.42982	1.27757e-10
9	22090521	rs9644859	G	A	G	N	ADD	16252	0.771175	0.0399781	-6.49957	8.05505e-11
9	22090603	rs9644860	C	T	C	N	ADD	16252	0.771148	0.039978	-6.50045	8.00775e-11
9	22090935	rs9644861	C	T	C	N	ADD	16252	0.768648	0.0400071	-6.57689	4.80403e-11
9	22090936	rs9644862	T	G	T	N	ADD	16252	0.768649	0.0400072	-6.57684	4.80558e-11
9	22091069	rs10811653	C	T	C	N	ADD	16252	0.771117	0.0399801	-6.5011	7.97345e-11
9	22091924	rs7866503	G	T	G	N	ADD	16252	0.770991	0.0399847	-6.50445	7.79758e-11
9	22092257	rs2210538	G	A	G	N	ADD	16252	0.772105	0.0400069	-6.46475	1.01468e-10
9	22092924	rs10811654	A	G	G	N	ADD	16252	1.29349	0.0400565	6.42456	1.32251e-10
9	22093299	rs4007642	A	T	T	N	ADD	16252	1.29423	0.0401579	6.4225	1.34058e-10
9	22094330	rs4977757	A	G	A	N	ADD	16252	0.77365	0.0400465	-6.40845	1.47009e-10
9	22094796	rs10738608	A	C	A	N	ADD	16252	0.773599	0.0400456	-6.41023	1.45302e-10
9	22096055	rs10757274	A	G	G	N	ADD	16252	1.29743	0.0399911	6.51113	7.45894e-11
9	22098574	rs4977574	A	G	G	N	ADD	16252	1.29494	0.0399893	6.46337	1.02398e-10
9	22098619	rs2891168	A	G	G	N	ADD	16252	1.29553	0.0399984	6.4732	9.59473e-11
9	22099568	rs1537371	C	A	C	N	ADD	16252	0.770134	0.0400369	-6.52374	6.85745e-11
9	22099746	rs5896965	T	TA	TA	N	ADD	16252	1.29575	0.0400268	6.47282	9.61895e-11
9	22100176	rs1556516	G	C	G	N	ADD	16252	0.77014	0.0400344	-6.52397	6.84694e-11
9	22102165	rs7859727	C	T	T	N	ADD	16252	1.29844	0.0400208	6.52572	6.76768e-11
9	22103183	rs1537372	G	T	T	N	ADD	16252	1.24961	0.0401538	5.54951	2.86477e-08
9	22103341	rs1537373	T	G	T	N	ADD	16252	0.768608	0.0400202	-6.57603	4.83169e-11
9	22103813	rs1333042	A	G	A	N	ADD	16252	0.768835	0.0400412	-6.56522	5.19556e-11
9	22105927	rs7859362	T	C	T	N	ADD	16252	0.779837	0.0400353	-6.21127	5.25579e-10
9	22106225	rs10757275	G	A	A	N	ADD	16252	1.2784	0.0400056	6.13935	8.28615e-10
9	22106271	rs6475609	A	G	A	N	ADD	16252	0.77993	0.040036	-6.20821	5.35928e-10
9	22106731	rs1333043	T	A	T	N	ADD	16252	0.78006	0.0400387	-6.20359	5.5188e-10
9	22110131	rs1412834	T	C	T	N	ADD	16252	0.779727	0.0400399	-6.2141	5.16206e-10
9	22111584	rs112917455	T	TATTTG	T	N	ADD	16252	0.775445	0.040128	-6.33768	2.33249e-10
9	22112241	rs7341786	A	C	A	N	ADD	16252	0.777808	0.0400825	-6.26896	3.63464e-10
9	22112427	rs7341791	A	G	A	N	ADD	16252	0.777728	0.0400862	-6.27094	3.58879e-10
9	22112599	rs10511701	T	C	T	N	ADD	16252	0.778253	0.0400557	-6.25886	3.87798e-10
9	22114469	rs10733376	G	C	G	N	ADD	16252	0.781206	0.0400274	-6.16868	6.88613e-10
9	22115026	rs2383206	A	G	A	N	ADD	16252	0.782595	0.0400021	-6.12816	8.88985e-10
9	22115286	rs944797	T	C	T	N	ADD	16252	0.782633	0.0400023	-6.12694	8.95863e-10
9	22115589	rs1004638	A	T	A	N	ADD	16252	0.781308	0.0400221	-6.16623	6.99364e-10
9	22115959	rs2383207	A	G	A	N	ADD	16252	0.780079	0.0400138	-6.20685	5.40588e-10
9	22116046	rs1537374	A	G	A	N	ADD	16252	0.781045	0.0400249	-6.17422	6.64904e-10
9	22116071	rs1537375	T	C	T	N	ADD	16252	0.781951	0.0400113	-6.14733	7.88004e-10
9	22116220	rs1537376	T	C	T	N	ADD	16252	0.782691	0.0400011	-6.12526	9.05349e-10
9	22119195	rs1333045	T	C	T	N	ADD	16252	0.78348	0.0397943	-6.13177	8.69089e-10
9	22120482	rs67452501	C	CT	C	N	ADD	16252	0.787071	0.040196	-5.95673	2.57339e-09
9	22121349	rs10217586	A	T	A	N	ADD	16252	0.784171	0.0400678	-6.06793	1.29569e-09
9	22121369	rs66653240	T	TA	T	N	ADD	16252	0.784215	0.0402746	-6.03537	1.58597e-09
9	22123766	rs10738610	A	C	C	N	ADD	16252	1.29173	0.039947	6.40811	1.47336e-10
9	22124123	rs1333046	T	A	A	N	ADD	16252	1.29251	0.0399584	6.42134	1.35084e-10
9	22124140	rs7857118	A	T	A	N	ADD	16252	0.770549	0.0400126	-6.51426	7.30513e-11
9	22124450	rs10757277	A	G	G	N	ADD	16252	1.29664	0.0397687	6.53208	6.4861e-11
9	22124472	rs10811656	C	T	T	N	ADD	16252	1.29169	0.0397638	6.43688	1.21953e-10
9	22124477	rs10757278	A	G	G	N	ADD	16252	1.29581	0.0397695	6.51586	7.22755e-11
9	22124504	rs1333047	A	T	A	N	ADD	16252	0.768303	0.0398012	-6.62218	3.53945e-11
9	22124630	rs10757279	A	G	G	N	ADD	16252	1.29561	0.039757	6.5142	7.30803e-11
9	22124744	rs4977575	C	G	C	N	ADD	16252	0.768634	0.0397998	-6.61158	3.8023e-11
9	22125347	rs1333048	A	C	C	N	ADD	16252	1.28929	0.0399441	6.36118	2.00206e-10
9	22125503	rs1333049	G	C	C	N	ADD	16252	1.28791	0.0397992	6.35747	2.05105e-10
Stroke infarct
7	102845295	rs188434692	G	A	A	N	ADD	15429	2.4981	0.165381	5.53588	3.09669e-08
7	103003667	rs142060250	T	G	G	N	ADD	15429	2.65043	0.167013	5.8362	5.34042e-09
Stroke any
2	205486017	2:205486017_TC_T	TC	T	T	N	ADD	16002	2.83086	0.17173	6.05941	1.37e-09
DR
6	32585504	rs3129761	G	C	C	N	ADD	11739	1.16265	0.0262315	5.74522	9.18e-09
6	32585967	rs3104412	A	G	G	N	ADD	11739	1.16127	0.0261163	5.72487	1.04e-08
6	32604152	rs9272324	A	G	G	N	ADD	11739	1.16457	0.0261902	5.81699	5.99e-09
6	32606314	rs9272505	C	T	T	N	ADD	11739	1.16126	0.0261805	5.71072	1.12e-08
6	32606315	rs9272506	A	G	G	N	ADD	11739	1.16126	0.0261805	5.71072	1.12e-08
6	32606819	rs9272539	G	A	A	N	ADD	11739	1.15947	0.0261365	5.66127	1.5e-08
6	32607516	rs9272588	T	C	C	N	ADD	11739	1.16036	0.0263006	5.65488	1.56e-08
6	32626272	rs9273363	C	A	A	N	ADD	11739	1.17853	0.0273416	6.00795	1.88e-09
6	32626302	rs9273364	T	G	G	N	ADD	11739	1.17874	0.0273405	6.01469	1.8e-09
6	32626438	rs9273367	A	T	T	N	ADD	11739	1.18064	0.0273307	6.07588	1.23e-09
6	32626475	rs9273368	G	A	A	N	ADD	11739	1.17853	0.0273437	6.00759	1.88e-09
6	32673894	rs1794269	C	T	T	N	ADD	11739	1.16583	0.0263369	5.82591	5.68e-09
6	32743744	rs9276625	G	A	A	N	ADD	11739	1.24389	0.0400127	5.45445	4.91e-08
6	32747502	rs4947258	A	G	G	N	ADD	11739	1.24658	0.0400044	5.50941	3.6e-08
6	32747790	rs4947349	G	T	T	N	ADD	11739	1.24673	0.0400053	5.51231	3.54e-08
6	32751244	rs9276688	C	T	T	N	ADD	11739	1.24657	0.0400044	5.50938	3.6e-08
6	32752333	rs719655	C	T	T	N	ADD	11739	1.24653	0.0400046	5.50854	3.62e-08
6	32752844	rs9276691	A	G	G	N	ADD	11739	1.2468	0.0400003	5.51446	3.5e-08
6	32755290	rs7762279	T	C	C	N	ADD	11739	1.24644	0.0400008	5.5071	3.65e-08
6	32756653	rs9276700	C	T	T	N	ADD	11739	1.24701	0.0399947	5.51943	3.4e-08
6	32776921	rs1054684	T	C	C	N	ADD	11739	1.25074	0.0405235	5.52119	3.37e-08
6	32780724	rs11244	G	A	A	N	ADD	11739	1.17568	0.0295603	5.4752	4.37e-08
DKD
3	171313412	rs73038008	T	C	C	N	ADD	7707	2.55243	0.166258	5.63608	1.74e-08
3	171313506	rs73038011	A	G	G	N	ADD	7707	2.51349	0.168349	5.47476	4.38e-08
3	171318013	rs6768605	A	G	G	N	ADD	7707	2.50417	0.167382	5.48422	4.15e-08
3	171331725	rs6798359	A	G	G	N	ADD	7707	2.49498	0.16725	5.46656	4.59e-08
3	171339992	rs113658125	C	A	A	N	ADD	7707	2.49349	0.167233	5.46354	4.67e-08
3	171342247	rs113437354	T	G	G	N	ADD	7707	2.49347	0.167244	5.46312	4.68e-08
3	171342259	rs113613931	T	C	C	N	ADD	7707	2.49321	0.167238	5.4627	4.69e-08
3	171342999	rs530489985	C	A	A	N	ADD	7707	2.60342	0.172557	5.54498	2.94e-08
3	171343910	rs112243343	T	C	C	N	ADD	7707	2.54443	0.168872	5.53028	3.2e-08
3	171345230	rs113186627	G	C	C	N	ADD	7707	2.49313	0.167231	5.46275	4.69e-08
3	171346987	rs113611537	A	G	G	N	ADD	7707	2.54425	0.168864	5.5301	3.2e-08
16	20359267	rs28640218	G	T	T	N	ADD	7707	0.755282	0.0511811	-5.48374	4.16e-08
16	20365082	rs113878851	C	CT	CT	N	ADD	7707	0.74074	0.0545308	-5.50342	3.73e-08
16	20365234	rs4997081	G	C	C	N	ADD	7707	0.755945	0.0510184	-5.48403	4.16e-08
16	20366507	rs13329952	T	C	C	N	ADD	7707	0.754364	0.0511734	-5.50834	3.62e-08
16	20366949	rs7204775	T	C	C	N	ADD	7707	0.757199	0.0510189	-5.45149	4.99e-08
16	20392332	rs77924615	G	A	A	N	ADD	7707	0.745124	0.0509682	-5.77233	7.82e-09

## Sheet: ACCORD
CHROM	POS	ID	REF	ALT	A1	FIRTH?	TEST	OBS_CT	OR	LOG(OR)_SE	Z_STAT	P
primary
2	209025961	2:209025961:A:G	A	G	G	N	ADD	4318	7.93059	0.379586	5.45523	4.89106e-08
CVD mortality
11	24854411	11:24854411:G:C	G	C	C	N	ADD	4318	3.75324	0.238884	5.53666	3.08e-08
11	24874851	11:24874851:A:G	A	G	G	N	ADD	4318	3.43552	0.221073	5.58262	2.37e-08
11	24877057	11:24877057:G:A	G	A	A	N	ADD	4318	3.48023	0.220503	5.65569	1.55e-08
11	24877800	11:24877800:C:T	C	T	T	N	ADD	4318	3.48435	0.220579	5.65912	1.52e-08
11	24882158	11:24882158:C:T	C	T	T	N	ADD	4318	3.33149	0.213736	5.63041	1.8e-08
11	24884031	11:24884031:A:C	A	C	C	N	ADD	4318	3.3009	0.211387	5.64933	1.61e-08
11	24890069	11:24890069:T:C	T	C	C	N	ADD	4318	3.32042	0.219107	5.4772	4.32e-08
17	51616084	17:51616084:A:G	A	G	G	N	ADD	4318	2.29722	0.14387	5.78092	7.43e-09
17	51620518	17:51620518:C:G	C	G	G	N	ADD	4318	2.2958	0.143899	5.77546	7.67e-09
22	50473684	22:50473684:C:G	C	G	G	N	ADD	4318	7.24028	0.342058	5.7875	7.14e-09
22	50479680	22:50479680:A:G	A	G	G	N	ADD	4318	6.84222	0.330482	5.81912	5.92e-09
nonfatal MI
2	209025961	2:209025961:A:G	A	G	G	N	ADD	4318	9.71953	0.405727	5.60509	2.08e-08
nonfatal stroke
1	48563675	1:48563675:A:G	A	G	G	N	ADD	4318	24.8131	0.579397	5.54261	2.98e-08
1	48567686	1:48567686:A:G	A	G	G	N	ADD	4318	25.5691	0.587	5.52195	3.35e-08
1	48568156	1:48568156:T:C	T	C	C	N	ADD	4318	25.5691	0.587	5.52195	3.35e-08
1	48579492	1:48579492:C:T	C	T	T	N	ADD	4318	27.5977	0.588432	5.63826	1.72e-08
9	132630589	9:132630589:C:T	C	T	T	N	ADD	4318	10.8685	0.391926	6.08756	1.15e-09
9	132635527	9:132635527:T:G	T	G	G	N	ADD	4318	7.99041	0.365244	5.69001	1.27e-08
16	24681417	16:24681417:C:T	C	T	T	N	ADD	4318	8.97061	0.40059	5.4768	4.33e-08
total stroke
1	48579492	1:48579492:C:T	C	T	T	N	ADD	4318	24.3145	0.58209	5.48209	4.2e-08
4	31080738	4:31080738:G:A	G	A	A	N	ADD	4318	9.81624	0.410296	5.56681	2.59e-08
9	132630589	9:132630589:C:T	C	T	T	N	ADD	4318	8.68293	0.389183	5.55359	2.8e-08
13	22395044	13:22395044:A:C	A	C	C	N	ADD	4318	13.5738	0.456139	5.71786	1.08e-08
16	63996813	16:63996813:C:G	C	G	G	N	ADD	4318	6.65245	0.343414	5.51808	3.43e-08
major CHD
6	92860714	6:92860714:A:T	A	T	A	N	ADD	4318	1.5754	0.082592	5.50307	3.73e-08
Neph3
12	108635932	12:108635932:C:T	C	T	T	N	ADD	4318	7.16476	0.357588	5.50682	3.65e-08
13	50067102	13:50067102:C:A	C	A	A	N	ADD	4318	11.3581	0.412889	5.88519	3.98e-09
Neph5
20	46578217	20:46578217:G:T	G	T	T	N	ADD	2912	3.06186	0.204317	5.47689	4.33e-08
20	46663205	20:46663205:C:T	C	T	T	N	ADD	2912	2.97416	0.185639	5.87139	4.32e-09
Retin1
2	84704112	2:84704112:C:T	C	T	T	N	ADD	4318	3.86086	0.242507	5.57052	2.54e-08
Retin4
12	46025200	12:46025200:T:C	T	C	C	N	ADD	4318	3.02128	0.201646	5.48328	4.18e-08
